# Supplementary material for: Predicting cross-protection against foot-and-mouth disease virus strains by serology after vaccination
Source: Front Vet Sci. 2022 Dec 1;9:1027006. doi: 10.3389/fvets.2022.1027006 (PMC9751447; doi:10.3389/fvets.2022.1027006)
Supplement: Supplementary file 3 [file Data_Sheet_1.xlsx]

## Sheet: BrehmEtAl2008
expt	sero	vacc	chal	log.titre	total	prot
9	A	A22.Iraq	A.Iran.97	1.04139	1	yes
9	A	A22.Iraq	A.Iran.97	1.34242	1	yes
9	A	A22.Iraq	A.Iran.97	1.04139	1	yes
9	A	A22.Iraq	A.Iran.97	1.20412	1	yes
9	A	A22.Iraq	A.Iran.97	1.20412	1	yes
9	A	A22.Iraq	A.Iran.97	<0.9	1	no
9	A	A22.Iraq	A.Iran.97	1.04139	1	no
9	A	A22.Iraq	A.Iran.97	0.90309	1	yes
9	A	A22.Iraq	A.Iran.97	<0.9	1	no
9	A	A22.Iraq	A.Iran.97	1.04139	1	yes
9	A	A22.Iraq	A.Iran.97	1.04139	1	yes
9	A	A22.Iraq	A.Iran.97	<0.9	1	no
9	A	A22.Iraq	A.Iran.97	<0.9	1	yes
9	A	A22.Iraq	A.Iran.97	<0.9	1	no
9	A	A22.Iraq	A.Iran.97	<0.9	1	no
10	A	A22.Iraq	A.Egypt.06	1.80618	1	yes
10	A	A22.Iraq	A.Egypt.06	1.80618	1	yes
10	A	A22.Iraq	A.Egypt.06	1.65321	1	yes
10	A	A22.Iraq	A.Egypt.06	1.65321	1	yes
10	A	A22.Iraq	A.Egypt.06	1.95424	1	yes
10	A	A22.Iraq	A.Egypt.06	0.90309	1	no
10	A	A22.Iraq	A.Egypt.06	1.65321	1	yes
10	A	A22.Iraq	A.Egypt.06	1.80618	1	yes
10	A	A22.Iraq	A.Egypt.06	1.50515	1	yes
10	A	A22.Iraq	A.Egypt.06	1.34242	1	no
10	A	A22.Iraq	A.Egypt.06	1.04139	1	yes
10	A	A22.Iraq	A.Egypt.06	1.04139	1	no
10	A	A22.Iraq	A.Egypt.06	1.04139	1	yes
10	A	A22.Iraq	A.Egypt.06	<0.9	1	no
10	A	A22.Iraq	A.Egypt.06	missing	1	yes
11	A	A22.Iraq	A.Iran.99	1.65321	1	yes
11	A	A22.Iraq	A.Iran.99	1.34242	1	yes
11	A	A22.Iraq	A.Iran.99	1.04139	1	yes
11	A	A22.Iraq	A.Iran.99	1.65321	1	yes
11	A	A22.Iraq	A.Iran.99	1.80618	1	yes
11	A	A22.Iraq	A.Iran.99	<0.9	1	no
11	A	A22.Iraq	A.Iran.99	1.34242	1	yes
11	A	A22.Iraq	A.Iran.99	0.90309	1	no
11	A	A22.Iraq	A.Iran.99	0.90309	1	no
11	A	A22.Iraq	A.Iran.99	1.65321	1	yes
11	A	A22.Iraq	A.Iran.99	<0.9	1	no
11	A	A22.Iraq	A.Iran.99	<0.9	1	no
11	A	A22.Iraq	A.Iran.99	1.04139	1	no
11	A	A22.Iraq	A.Iran.99	1.20412	1	no
11	A	A22.Iraq	A.Iran.99	missing	1	no
12	A	A.Iran.99	A22.Iraq	1.65321	1	yes
12	A	A.Iran.99	A22.Iraq	0.90309	1	yes
12	A	A.Iran.99	A22.Iraq	1.20412	1	yes
12	A	A.Iran.99	A22.Iraq	1.20412	1	yes
12	A	A.Iran.99	A22.Iraq	1.34242	1	yes
12	A	A.Iran.99	A22.Iraq	0.90309	1	no
12	A	A.Iran.99	A22.Iraq	1.50515	1	yes
12	A	A.Iran.99	A22.Iraq	1.20412	1	yes
12	A	A.Iran.99	A22.Iraq	1.50515	1	yes
12	A	A.Iran.99	A22.Iraq	1.20412	1	yes
12	A	A.Iran.99	A22.Iraq	1.04139	1	yes
12	A	A.Iran.99	A22.Iraq	0.90309	1	no
12	A	A.Iran.99	A22.Iraq	0.90309	1	no
12	A	A.Iran.99	A22.Iraq	1.80618	1	yes
12	A	A.Iran.99	A22.Iraq	missing	1	yes
13	A	A.Iran.99	A.Iran.96	1.65321	1	yes
13	A	A.Iran.99	A.Iran.96	1.34242	1	yes
13	A	A.Iran.99	A.Iran.96	2.25042	1	yes
13	A	A.Iran.99	A.Iran.96	1.50515	1	yes
13	A	A.Iran.99	A.Iran.96	1.34242	1	yes
13	A	A.Iran.99	A.Iran.96	1.65321	1	yes
13	A	A.Iran.99	A.Iran.96	1.65321	1	yes
13	A	A.Iran.99	A.Iran.96	1.95424	1	yes
13	A	A.Iran.99	A.Iran.96	1.65321	1	yes
13	A	A.Iran.99	A.Iran.96	1.34242	1	yes
13	A	A.Iran.99	A.Iran.96	1.20412	1	yes
13	A	A.Iran.99	A.Iran.96	<0.9	1	yes
13	A	A.Iran.99	A.Iran.96	<0.9	1	no
13	A	A.Iran.99	A.Iran.96	1.34242	1	no
13	A	A.Iran.99	A.Iran.96	0.90309	1	yes
14	A	A.Iran.96	A.Iran.99	1.04139	1	yes
14	A	A.Iran.96	A.Iran.99	1.20412	1	yes
14	A	A.Iran.96	A.Iran.99	1.80618	1	yes
14	A	A.Iran.96	A.Iran.99	1.34242	1	yes
14	A	A.Iran.96	A.Iran.99	<0.9	1	yes
14	A	A.Iran.96	A.Iran.99	1.04139	1	yes
14	A	A.Iran.96	A.Iran.99	0.90309	1	no
14	A	A.Iran.96	A.Iran.99	1.34242	1	yes
14	A	A.Iran.96	A.Iran.99	0.90309	1	yes
14	A	A.Iran.96	A.Iran.99	<0.9	1	yes
14	A	A.Iran.96	A.Iran.99	<0.9	1	no
14	A	A.Iran.96	A.Iran.99	1.04139	1	yes
14	A	A.Iran.96	A.Iran.99	<0.9	1	no
14	A	A.Iran.96	A.Iran.99	<0.9	1	no
14	A	A.Iran.96	A.Iran.99	0.90309	1	yes
15	A	A.Iran.96	A22.Iraq	<0.9	1	no
15	A	A.Iran.96	A22.Iraq	<0.9	1	yes
15	A	A.Iran.96	A22.Iraq	<0.9	1	no
15	A	A.Iran.96	A22.Iraq	1.20412	1	yes
15	A	A.Iran.96	A22.Iraq	<0.9	1	no
15	A	A.Iran.96	A22.Iraq	<0.9	1	no
15	A	A.Iran.96	A22.Iraq	<0.9	1	yes
15	A	A.Iran.96	A22.Iraq	<0.9	1	no
15	A	A.Iran.96	A22.Iraq	missing	1	no
15	A	A.Iran.96	A22.Iraq	1.04139	1	yes
15	A	A.Iran.96	A22.Iraq	<0.9	1	no
15	A	A.Iran.96	A22.Iraq	<0.9	1	no
15	A	A.Iran.96	A22.Iraq	0.90309	1	no
15	A	A.Iran.96	A22.Iraq	<0.9	1	no
15	A	A.Iran.96	A22.Iraq	0.90309	1	yes
16	A	A.Iran.96	A22.Iraq	1.50515	1	yes
16	A	A.Iran.96	A22.Iraq	1.95424	1	yes
16	A	A.Iran.96	A22.Iraq	1.20412	1	yes
16	A	A.Iran.96	A22.Iraq	1.34242	1	yes
16	A	A.Iran.96	A22.Iraq	1.34242	1	yes
16	A	A.Iran.96	A22.Iraq	0.90309	1	yes
16	A	A.Iran.96	A22.Iraq	1.34242	1	yes
16	A	A.Iran.96	A22.Iraq	1.80618	1	yes
16	A	A.Iran.96	A22.Iraq	0.90309	1	yes
16	A	A.Iran.96	A22.Iraq	<0.9	1	no
16	A	A.Iran.96	A22.Iraq	1.34242	1	no
16	A	A.Iran.96	A22.Iraq	<0.9	1	yes
16	A	A.Iran.96	A22.Iraq	<0.9	1	no
16	A	A.Iran.96	A22.Iraq	<0.9	1	no
16	A	A.Iran.96	A22.Iraq	1.34242	1	no

## Sheet: NagendrakumarEtAl2011
expt	sero	vacc	chal	log.titre	total	prot
2	O	O.Manisa	O.Campos	1.8	1	1
2	O	O.Manisa	O.Campos	2.1	1	1
2	O	O.Manisa	O.Campos	2.85	1	1
2	O	O.Manisa	O.Campos	2.4	1	1
2	O	O.Manisa	O.Campos	1.95	1	0
2	O	O.Manisa	O.Campos	2.4	1	0
2	O	O.Manisa	O.Campos	2.4	1	1
2	O	O.Manisa	O.Campos	1.65	1	1
2	O	O.Manisa	O.Campos	2.11	1	1
2	O	O.Manisa	O.Campos	2.25	1	1
2	O	O.Manisa	O.Campos	1.81	1	0
2	O	O.Manisa	O.Campos	1.34	1	0
2	O	O.Manisa	O.Campos	1.51	1	1
2	O	O.Manisa	O.Campos	1.65	1	0
2	O	O.Manisa	O.Campos	1.2	1	0
2	O	O.Manisa	O.Campos	0.61	1	1
2	O	O.Manisa	O.Campos	1.35	1	0
2	O	O.Manisa	O.Campos	1.8	1	0
2	O	O.Manisa	O.Campos	1.2	1	0
2	O	O.Manisa	O.Campos	1.95	1	1
2	O	O.Manisa	O.Campos	2.25	1	1
2	O	O.Manisa	O.Campos	1.65	1	0
2	O	O.Manisa	O.Campos	1.8	1	0
2	O	O.Manisa	O.Campos	2.55	1	0
2	O	O.Manisa	O.Campos	1.66	1	1
2	O	O.Manisa	O.Campos	1.66	1	1
2	O	O.Manisa	O.Campos	1.81	1	1
2	O	O.Manisa	O.Campos	2.56	1	1
2	O	O.Manisa	O.Campos	2.11	1	1
2	O	O.Manisa	O.Campos	1.81	1	1
2	O	O.Manisa	O.Campos	1.66	1	1
2	O	O.Manisa	O.Campos	1.66	1	0
2	O	O.Manisa	O.Campos	2.56	1	1
2	O	O.Manisa	O.Campos	2.11	1	0
2	O	O.Manisa	O.Campos	1.36	1	0
2	O	O.Manisa	O.Campos	0.91	1	0
2	O	O.Manisa	O.Campos	1.66	1	0
2	O	O.Manisa	O.Campos	1.51	1	0
2	O	O.Manisa	O.Campos	1.36	1	0

## Sheet: DuqueEtAl2016
expt	sero	vacc	chal	log.titre	total	prot
4	O	O.Campos	O.Ecuador	2.25042	1	P
4	O	O.Campos	O.Ecuador	2.40824	1	P
4	O	O.Campos	O.Ecuador	1.95424	1	P
4	O	O.Campos	O.Ecuador	1.20412	1	P
4	O	O.Campos	O.Ecuador	1.95424	1	NP
4	O	O.Campos	O.Ecuador	1.80618	1	P
4	O	O.Campos	O.Ecuador	1.65321	1	P
4	O	O.Campos	O.Ecuador	2.70927	1	P
4	O	O.Campos	O.Ecuador	2.40824	1	P
4	O	O.Campos	O.Ecuador	2.25042	1	P
5	O	O.Campos	O.Ecuador	1.50515	1	NP
5	O	O.Campos	O.Ecuador	1.04139	1	NP
5	O	O.Campos	O.Ecuador	1.20412	1	P
5	O	O.Campos	O.Ecuador	1.65321	1	P
5	O	O.Campos	O.Ecuador	1.04139	1	P
5	O	O.Campos	O.Ecuador	1.50515	1	P
5	O	O.Campos	O.Ecuador	1.65321	1	NP
5	O	O.Campos	O.Ecuador	1.20412	1	NP
5	O	O.Campos	O.Ecuador	1.80618	1	P
5	O	O.Campos	O.Ecuador	1.34242	1	NP

## Sheet: FishbourneEtAl2017
expt	sero	vacc	chal	titre	log.titre	total	prot
1	O	O.Manisa	O.Ind2001	1024	3.0103	1	YES
1	O	O.Manisa	O.Ind2001	256	2.40824	1	NO
1	O	O.Manisa	O.Ind2001	1413	3.15014	1	YES
1	O	O.Manisa	O.Ind2001	1024	3.0103	1	YES
1	O	O.Manisa	O.Ind2001	45	1.65321	1	NO
1	O	O.Manisa	O.Ind2001	1024	3.0103	1	YES
1	O	O.Manisa	O.Ind2001	45	1.65321	1	NO
1	O	O.Manisa	O.Ind2001	708	2.85003	1	YES
1	O	O.Manisa	O.Ind2001	708	2.85003	1	YES
1	O	O.Manisa	O.Ind2001	1024	3.0103	1	YES
1	O	O.Manisa	O.Ind2001	4	0.60206	1	NO
1	O	O.Manisa	O.Ind2001	22	1.34242	1	NO
1	O	O.Manisa	O.Ind2001	32	1.50515	1	NO
1	O	O.Manisa	O.Ind2001	64	1.80618	1	NO
1	O	O.Manisa	O.Ind2001	708	2.85003	1	NO

## Sheet: WatersEtAl2018
expt	sero	vacc	chal	titre	log.titre	total	prot
6	A	AIrn05/ASau95	A/ASIA/G-VII	8	0.90309	1	1
6	A	AIrn05/ASau95	A/ASIA/G-VII	32	1.50515	1	0
6	A	AIrn05/ASau95	A/ASIA/G-VII	16	1.20412	1	0
6	A	AIrn05/ASau95	A/ASIA/G-VII	22	1.34242	1	1
6	A	AIrn05/ASau95	A/ASIA/G-VII	32	1.50515	1	1
6	A	AIrn05/ASau95	A/ASIA/G-VII	22	1.34242	1	0
6	A	AIrn05/ASau95	A/ASIA/G-VII	32	1.50515	1	0
6	A	AIrn05/ASau95	A/ASIA/G-VII	16	1.20412	1	1
6	A	AIrn05/ASau95	A/ASIA/G-VII	8	0.90309	1	0
6	A	AIrn05/ASau95	A/ASIA/G-VII	22	1.34242	1	0
6	A	AIrn05/ASau95	A/ASIA/G-VII	8	0.90309	1	1
6	A	AIrn05/ASau95	A/ASIA/G-VII	22	1.34242	1	1
6	A	AIrn05/ASau95	A/ASIA/G-VII	22	1.34242	1	1
6	A	AIrn05/ASau95	A/ASIA/G-VII	22	1.34242	1	1
6	A	AIrn05/ASau95	A/ASIA/G-VII	22	1.34242	1	0
6	A	AIrn05/ASau95	A/ASIA/G-VII	8	0.90309	1	1

## Sheet: DekkerEtAl2020
expt	sero	vacc	chal	log.titre.WBVR	titre.WRL	log.titre.WRL	total	prot
7	A	A22	AIrn2015	1.2	32	1.50515	1	1
7	A	A22	AIrn2015	1.05	22	1.34242	1	0
7	A	A22	AIrn2015	1.5	22	1.34242	1	0
7	A	A22	AIrn2015	1.5	16	1.20412	1	0
7	A	A22	AIrn2015	1.05	22	1.34242	1	0
7	A	A22	AIrn2015	1.2	32	1.50515	1	1
7	A	A22	AIrn2015	0.6	<8	0.60206	1	0
8	A	AMay97	AIrn2015	1.95	64	1.80618	1	1
8	A	AMay97	AIrn2015	1.95	45	1.65321	1	1
8	A	AMay97	AIrn2015	2.1	64	1.80618	1	1
8	A	AMay97	AIrn2015	2.1	90	1.95424	1	1
8	A	AMay97	AIrn2015	2.1	45	1.65321	1	1
8	A	AMay97	AIrn2015	1.5	22	1.34242	1	1
8	A	AMay97	AIrn2015	1.8	22	1.34242	1	1
8	A	AMay97	AIrn2015	1.2	11	1.04139	1	1
8	A	AMay97	AIrn2015	1.5	45	1.65321	1	1
8	A	AMay97	AIrn2015	1.2	64	1.80618	1	1
8	A	AMay97	AIrn2015	1.65	128	2.10721	1	1
8	A	AMay97	AIrn2015	1.35	90	1.95424	1	1
8	A	AMay97	AIrn2015	1.35	16	1.20412	1	1
8	A	AMay97	AIrn2015	1.05	22	1.34242	1	1
8	A	AMay97	AIrn2015	1.65	90	1.95424	1	1
8	A	AMay97	AIrn2015	0.75	16	1.20412	1	1
8	A	AMay97	AIrn2015	0.6	8	0.90309	1	0
8	A	AMay97	AIrn2015	0.9	16	1.20412	1	0
8	A	AMay97	AIrn2015	1.2	32	1.50515	1	1
8	A	AMay97	AIrn2015	0.75	22	1.34242	1	1
8	A	AMay97	AIrn2015	0.3	<8	0.60206	1	0
8	A	AMay97	AIrn2015	0.3	<8	0.60206	1	0

## Sheet: LiEtAl_Asia1
expt	sero	vacc	chal	titre	log.titre	total	prot
17	Asia1	Asia1.Shamir	Asia1.Tur11	32	1.50515	1	pass
17	Asia1	Asia1.Shamir	Asia1.Tur11	22	1.34242	1	pass
17	Asia1	Asia1.Shamir	Asia1.Tur11	90	1.95424	1	pass
17	Asia1	Asia1.Shamir	Asia1.Tur11	45	1.65321	1	pass
17	Asia1	Asia1.Shamir	Asia1.Tur11	64	1.80618	1	pass
17	Asia1	Asia1.Shamir	Asia1.Tur11	32	1.50515	1	pass
17	Asia1	Asia1.Shamir	Asia1.Tur11	11	1.04139	1	pass
17	Asia1	Asia1.Shamir	Asia1.Tur11	64	1.80618	1	pass
17	Asia1	Asia1.Shamir	Asia1.Tur11	90	1.95424	1	pass
17	Asia1	Asia1.Shamir	Asia1.Tur11	128	2.10721	1	pass
17	Asia1	Asia1.Shamir	Asia1.Tur11	11	1.04139	1	pass
17	Asia1	Asia1.Shamir	Asia1.Tur11	4	0.60206	1	pass
17	Asia1	Asia1.Shamir	Asia1.Tur11	16	1.20412	1	pass
17	Asia1	Asia1.Shamir	Asia1.Tur11	32	1.50515	1	fail
17	Asia1	Asia1.Shamir	Asia1.Tur11	45	1.65321	1	fail

## Sheet: DekkerEtAl_SAT2
expt	sero	vacc	chal	log.titre.WBVR	log.titre.WRL	total	prot
18	SAT2	SAT2.Sau.2000	SAT2.Libya.2012	1.05	1.65	1	1
18	SAT2	SAT2.Sau.2000	SAT2.Libya.2012	1.2	1.65	1	1
18	SAT2	SAT2.Sau.2000	SAT2.Libya.2012	1.2	1.65	1	1
18	SAT2	SAT2.Sau.2000	SAT2.Libya.2012	1.2	1.65	1	1
18	SAT2	SAT2.Sau.2000	SAT2.Libya.2012	1.5	1.95	1	1
18	SAT2	SAT2.Sau.2000	SAT2.Libya.2012	1.35	1.95	1	0
18	SAT2	SAT2.Sau.2000	SAT2.Libya.2012	0.9	1.35	1	0
18	SAT2	SAT2.Sau.2000	SAT2.Libya.2012	1.35	1.65	1	1
18	SAT2	SAT2.Sau.2000	SAT2.Libya.2012	1.2	1.65	1	1
18	SAT2	SAT2.Sau.2000	SAT2.Libya.2012	0.9	1.35	1	0
18	SAT2	SAT2.Sau.2000	SAT2.Libya.2012	0.9	1.65	1	1
18	SAT2	SAT2.Sau.2000	SAT2.Libya.2012	0.75	1.35	1	0
18	SAT2	SAT2.Sau.2000	SAT2.Libya.2012	0.9	1.65	1	1
18	SAT2	SAT2.Sau.2000	SAT2.Libya.2012	1.2	1.35	1	1
18	SAT2	SAT2.Sau.2000	SAT2.Libya.2012	1.05	1.5	1	1

## Sheet: PatonEtAl_O
expt	sero	vacc	chal	log.titre	total	prot
3	O	O.Manisa	O.Irn06	1.34	1	p
3	O	O.Manisa	O.Irn06	1.95	1	f
3	O	O.Manisa	O.Irn06	1.81	1	p
3	O	O.Manisa	O.Irn06	2.11	1	p
3	O	O.Manisa	O.Irn06	1.95	1	p
3	O	O.Manisa	O.Irn06	1.81	1	p
3	O	O.Manisa	O.Irn06	<0.9	1	f
3	O	O.Manisa	O.Irn06	1.04	1	f
3	O	O.Manisa	O.Irn06	1.51	1	f
3	O	O.Manisa	O.Irn06	1.65	1	p
3	O	O.Manisa	O.Irn06	1.2	1	f
3	O	O.Manisa	O.Irn06	0.9	1	f
3	O	O.Manisa	O.Irn06	<0.9	1	f
3	O	O.Manisa	O.Irn06	1.51	1	p
3	O	O.Manisa	O.Irn06	<0.9	1	f

## Sheet: Notes
Worksheet	Source	Notes
BrehmEtAl2008	Brehm et al. (2008) Vaccine 26, 1681-1687	titres for samples when retested at Pirbright
Nagendrakumar et al. 2011	Nagendrakumar et al (2011) Vaccine 29, 1906-1912	titres from original paper (not redone at Pirbright)
DuqueEtAl2016	Duque et al (2016) Vaccine 34, 4140-4144	titres for samples when retested at Pirbright
FishbourneEtAl2017	Fishbourne et al (2017) Vaccine 35, 2761-2765	titres from original paper (done at Pirbright)
WatersEtAl2018	Waters at al (2018) Vaccine 36, 1901-1906	titres from original paper (done at Pirbright)
DekkerEtAl2020	Dekker et al (2020) Vaccines 8, 24	titres from original paper and from retesting at Pirbright
LiEtAl_Asia1	unpublished data	titres from Pirbright
DekkerEtAl_SAT2	unpublished data	titres from Wageningen BioVet Research and from retesting at Pirbright
PatonEtAl_O	unpublished data	titres from Pirbright
Field name	Description
expt	experiment identifier (1-18)
sero	serotype of vaccine (and challenge) strain
vacc	vaccine strain
chal	challenge strain
titre	virus neutralisation titre
log.titre	log10 virus neutralisation titre
titre.WRL	virus neutralisation titre (test carried out at Pirbright)
log.titre.WBVR	log10 virus neutralisation titre (test carried out at Wageningen)
log.titre.WRL	log10 virus neutralisation titre (test carried out at Pirbright)
total	number of cattle tested (as each row is for a single animal this is always 1)
prot	was the animal protected? variously coded as:
	protected = yes, 1, P, pass, p
	not protected = no, 0, NP, FAIL, f
